# Supplementary material
Source: publisher figshare collection journal article supplement (https://diabetesjournals.figshare.com/articles/dataset/_/21264837)
Supplement: Supplementary file 1 [file 1]

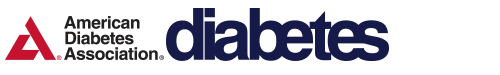
**Checklist for Reporting Human Islet Preparations Used in Research**

Adapted from Hart NJ, Powers AC (2018) Progress, challenges, and suggestions for using human islets to understand islet biology and human diabetes. Diabetologia <https://doi.org/10.1007/s00125-018-4772-2>.

|  | |
| --- | --- |
| **Manuscript DOI:** DB22-0191.R2 | |
| **Title:** Recognition of mRNA splice variant and secretory granule epitopes by CD4+ T cells in type 1 diabetes | |
| **Author list:** Perrin Guyer, David Arribas-Layton, Anthony Manganaro, Cate Speake, Sandra M. Lord, Decio L. Eizirik, Sally C. Kent, Roberto Mallone, and Eddie A. James | |
| **Corresponding author:** Eddie A. James | **Email address:** ejames@benaroyaresearch.org |

| **Islet preparation** | **1** | **2** | **3** | **4** | **5** | **6** | **7** | **8a** |
| --- | --- | --- | --- | --- | --- | --- | --- | --- |
| **MANDATORY INFORMATION** | | | | | | | | |
| Unique identifier | R335 | nPOD 6472  RRID:SAMN15879525 |  |  |  |  |  |  |
| Donor age (years) | 25 | 10.25 |  |  |  |  |  |  |
| Donor sex (M/F) | M | F |  |  |  |  |  |  |
| Donor BMI (kg/m2) | 24.6 | 16.6 |  |  |  |  |  |  |
| Donor HbA1c or other measure of blood glucose control | 4.9 | 9.7 |  |  |  |  |  |  |
| Origin/source of isletsb | Alberta IsletCore | nPOD |  |  |  |  |  |  |
| Islet isolation centre | ADI IsletCore | N/A (see below) |  |  |  |  |  |  |
| Donor history of diabetes? Yes/No | No | Yes |  |  |  |  |  |  |
| **If Yes, complete the next two lines if this information is available** | | | | | | | | |
| Diabetes duration (years) |  | 4 |  |  |  |  |  |  |
| Glucose-lowering therapy at time of deathc |  | Insulin pump |  |  |  |  |  |  |

| **RECOMMENDED INFORMATION** | | | | | | | | |
| --- | --- | --- | --- | --- | --- | --- | --- | --- |
| Donor cause of death |  | DKA |  |  |  |  |  |  |
| Warm ischaemia time (h) |  | unknown |  |  |  |  |  |  |
| Cold ischaemia time (h) |  | unknown |  |  |  |  |  |  |
| Estimated purity (%) |  | N/A (see below) |  |  |  |  |  |  |
| Estimated viability (%) |  | N/A |  |  |  |  |  |  |
| Total culture time (h)d |  | unknown |  |  |  |  |  |  |
| Glucose-stimulated insulin secretion or other functional measuremente |  | Not measured |  |  |  |  |  |  |
| Handpicked to purity? Yes/No |  | Yes |  |  |  |  |  |  |
| Additional notes |  | nPOD Slice program  nPOD, Cat# nPOD_6472, RRID:SAMN15879525  Live 150 µ width slices were digested with collagenase P, single hand picked islets were plated 1/well with T cell stimulation and growth factors for T cell outgrowth and expansion. |  |  |  |  |  |  |

aIf you have used more than eight islet preparations, please complete additional forms as necessary

bFor example, IIDP, ECIT, Alberta IsletCore

cPlease specify the therapy/therapies

dTime of islet culture at the isolation centre, during shipment and at the receiving laboratory

ePlease specify the test and the results
