# Supplementary material
Source: publisher figshare collection journal article supplement (https://diabetesjournals.figshare.com/articles/dataset/_/21264837)
Supplement: Supplementary file 1 [file 1]

A

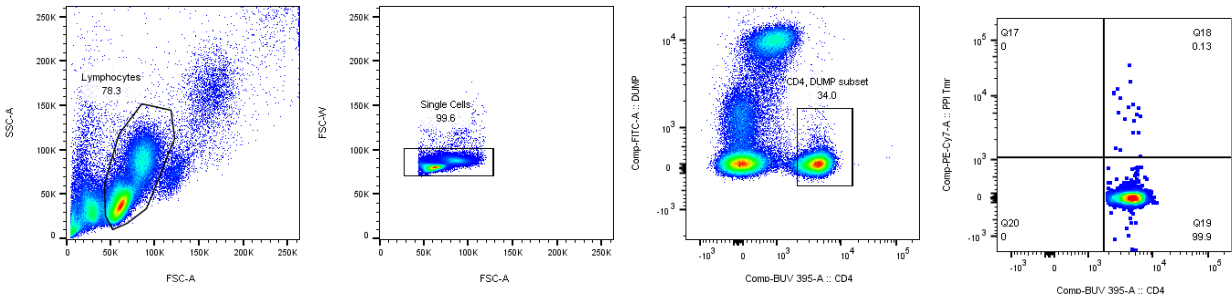

B

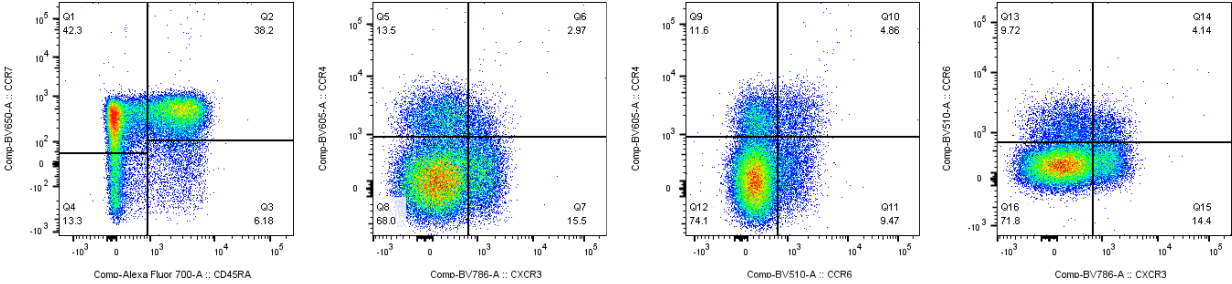

**Supplemental Figure 1 – Surface marker gating for T cell analysis.** FACS plots from a representative subject with T1D show the gating scheme used for CD4 T cell analysis. **A:** We sequentially gated lymphocytes (FSC-A versus SSC-A), single cells (FSC-A versus FSC-W), and viable CD4+ T cells (CD4 versus Dump). For viable CD4+ T cells, positive thresholds were then set for each tetramer channel, as shown for the representative PE-Cy7 labeled PPI tetramer. **B:** For viable CD4+ T cells, positive thresholds were also set to define naïve and memory subsets (CD45RA versus CCR7) and positive thresholds for CXCR3, CCR4, and CCR6. Using these threshold MFI values, sequential gating was then applied to define Th1-like (CXCR3+, CCR4- and CCR6-), Th2-like (CXCR3-, CCR4+ and CCR6-), Th17-like (CXCR3-, CCR4+ and CCR6+), Th1/17-like (CXCR3+, CCR4- and CCR6+), Th1/2-like (CXCR3+, CCR4+ and CCR6-), or Th1\*-like (CXCR3+, CCR4+ and CCR6+) lineages.

**Supplemental Table 1. DRB1\*4:01+ subjects with type 1diabetes used for in vitro assays**

| Subject ID | Age <sup>a</sup> | Sex    | Time Since Diagnosis <sup>a</sup> | Auto-antibody status <sup>b</sup> |
|------------|------------------|--------|-----------------------------------|-----------------------------------|
| T1D #1     | 29               | Male   | 4.3 years                         | IAA, IA2, ZnT8                    |
| T1D #2     | 20               | Female | 1.9 years                         | GAD, IAA, IA2, ZnT8               |
| T1D #3     | 26               | Female | 1.4 years                         | GAD, IAA, IA2                     |
| T1D #4     | 31               | Female | 5.1 years                         | GAD, IA2, ZnT8                    |
| T1D #5     | 30               | Female | 3.2 years                         | GAD, IAA, IA2, ZnT8               |
| T1D #6     | 32               | Female | 7.3 years                         | GAD, IAA, IA2, ZnT8               |
| T1D #7     | 29               | Male   | 9.9 years                         | IAA, IA2                          |
| T1D #8     | 31               | Female | 3.1 years                         | IAA, IA2                          |
| T1D #9     | 37               | Male   | 7.1 years                         | GAD, IAA, IA2, ZnT8               |
| T1D #10    | 29               | Female | 12.6 years                        | GAD, IAA, IA2                     |
| T1D #11    | 32               | Male   | 7.1 years                         | IAA                               |
| T1D #12    | 39               | Female | 27.9 years                        | GAD, IA2                          |
| T1D #13    | 40               | Female | 4.4 years                         | GAD                               |
| T1D #14    | 31               | Female | 3.5 years                         | GAD, IAA                          |
| T1D #15    | 36               | Female | 31.5 years                        | IAA, IA2                          |

<sup>a</sup>The mean age of patients was 31.5 years. The mean time since diagnosis was 8.7 years.

<sup>b</sup>GAD denotes glutamic acid decarboxylase 65, IAA denotes (micro) insulin, IA2 denotes tyrosine phosphatase-related islet antigen 2, ZnT8 denotes zinc transporter 8. Autoantibody data is historical and was not in done conjunction with the current study.

**Supplemental Table 2. DRB1\*4:01+ subjects with type 1 diabetes used for direct staining**

| Subject ID | Age <sup>a</sup> | Sex    | Time Since Diagnosis <sup>a</sup> | Auto-antibody status <sup>b</sup> |
|------------|------------------|--------|-----------------------------------|-----------------------------------|
| T1D #1     | 23               | Female | 4.8 years                         | IAA, IA2, ZnT8                    |
| T1D #2     | 70               | Female | 14.5 years                        | IAA                               |
| T1D #3     | 29               | Male   | 5.6 years                         | GAD, IAA                          |
| T1D #4     | 53               | Male   | 37.8 years                        | GAD, IAA                          |
| T1D #5     | 56               | Female | 42.6 years                        | IAA                               |
| T1D #6     | 25               | Male   | 2.3 years                         | IAA, IA2, ZnT8                    |
| T1D #7     | 34               | Female | 31.6 years                        | IAA                               |
| T1D #8     | 63               | Male   | 48.8 years                        | No results                        |
| T1D #9     | 42               | Male   | 12.7 years                        | GAD, IAA                          |
| T1D #10    | 59               | Female | 14.1 years                        | GAD                               |

<sup>a</sup>The mean age of patients was 45.4 years. The mean time since diagnosis was 21.4 years.

<sup>b</sup>GAD denotes glutamic acid decarboxylase 65, IAA denotes (micro) insulin, IA2 denotes tyrosine phosphatase-related islet antigen 2, ZnT8 denotes zinc transporter 8. Autoantibody data is historical and was not in done conjunction with the current study.

**Supplemental Table 3. DRB1\*04:01 healthy subjects used for direct staining**

| Subject ID | Age | Sex    |
|------------|-----|--------|
| Control #1 | 62  | Male   |
| Control #2 | 58  | Female |
| Control #3 | 53  | Male   |
| Control #4 | 42  | Female |
| Control #5 | 22  | Female |
| Control #6 | 67  | Female |
| Control #7 | 34  | Female |
| Control #8 | 46  | Male   |

The mean age of controls was 48 years.

Healthy subjects under the age of 18 could not be recruited.

**Supplemental Table 4. Organ donor with diabetes used for study**

| Case ID <sup>a</sup> | Age | Sex    | Time Since Diagnosis | HLA-DR Type      |
|----------------------|-----|--------|----------------------|------------------|
| nPOD 6472            | 10  | Female | 4 years              | DRB1*03:01/04:04 |

<sup>a</sup>CD4+ T cell lines were isolated from vibratome slices of pancreas tissue from this organ donor (Cat# nPOD\_6472, RRID:SAMN15879525).

**Supplemental Table 5. Splice Variant and Secretory Granule Peptides with Predicted DR0401 Binding Motifs**

| Peptide             | Sequence                   | Measured IC <sub>50</sub> (μM) <sup>a,b</sup> |
|---------------------|----------------------------|-----------------------------------------------|
| CCNI-008 p1         | SEILRMERIILDKLN            | >50                                           |
| CCNI-008 p2         | MERIILDKLNWDLHT            | >50                                           |
| CCNI-008 p3         | KLNWDLHTATPLDFL            | >50                                           |
| <b>CCNI-008 p4</b>  | <b>HTATPLDFLHIMDSSQLIH</b> | <b>7.2</b>                                    |
| CCNI-008 p5         | ATPLDFLHIMDSSQ             | >50                                           |
| <b>CCNI-008 p6</b>  | <b>DFLHIMDSSQLIH</b>       | <b>20.1</b>                                   |
| <b>CCNI-008 p7</b>  | <b>LHIMDSSQLIHCRE</b>      | <b>15.1</b>                                   |
| CCNI-008 p8         | SSQLIHCRELVAHHL            | >50                                           |
| <b>CCNI-008 p9</b>  | <b>RELVAHHLSTLQSSL</b>     | <b>11.4</b>                                   |
| CCNI-008 p10        | LSTLQSSLPLNSVYV            | >50                                           |
| <b>GAD2-003 p1</b>  | <b>LKYAIKTGIVSSKII</b>     | <b>37.3</b>                                   |
| GAD2-003 p2         | KTGIVSSKIIKLFFR            | >50                                           |
| GNAS-002 p1         | AQQWRRARHNYNDL             | >50                                           |
| GNAS-002 p2         | GRRAATALLWLSCSI            | >50                                           |
| GNAS-002 p3         | ATALLWLSCSIALLRAL          | >50                                           |
| GNAS-002 p4         | SCSIALLRALATSNA            | >50                                           |
| <b>GNAS-002 p5</b>  | <b>IALLRALATSNAARAQ</b>    | <b>0.02</b>                                   |
| GNAS-002 p6         | AQVPESPESEDHE              | >50                                           |
| GNAS-002 p7         | ELSLPECLEYEEEFD            | >50                                           |
| GNAS-002 p8         | LEYEEEFDYETESE             | >50                                           |
| GNAS-002 p9         | EEFDYETESETESE             | >50                                           |
| GNAS-002 p10        | EFDYETESETESEIE            | >50                                           |
| GNAS-002 p11        | ESEISETDFETEPE             | >50                                           |
| GNAS-002 p12        | ETDFETEPETAPTTP            | >50                                           |
| GNAS-002 p13        | GPVVPKHSTFGQSLT            | >50                                           |
| GNAS-002 p14        | HSTFGQSLTQRLHAL            | >50                                           |
| GNAS-036 p1         | DKQLQDEKMGYMCTH            | >50                                           |
| GNAS-036 p2         | DEKMGYMCTHRLLL             | >50                                           |
| GNAS-036 p3         | THRLLLLGAGESGKS            | >50                                           |
| GNAS-036 p4         | LLGAGESGKSTIV              | >50                                           |
| GNAS-036 p5         | STIVKQMRILHVNGF            | >50                                           |
| GNAS-036 p6         | MRILHVNGFNGDEKA            | >50                                           |
| GNAS-036 p7         | LKEAIETIVAAMSNL            | >50                                           |
| <b>GNAS-036 p8</b>  | <b>IETIVAAMSNLVPPV</b>     | <b>0.15</b>                                   |
| <b>GNAS-036 p9</b>  | <b>ENQFRVDYILSVMNV</b>     | <b>0.17</b>                                   |
| <b>GNAS-036 p10</b> | <b>RVDYILSVMNVPDFD</b>     | <b>10.9</b>                                   |
| GNAS-036 p11        | DFDFPPEFYEHAKAL            | >50                                           |
| GNAS-036 p12        | PEFYEHAKALWEDEG            | >50                                           |
| GNAS-036 p13        | KALWEDEGVRACYER            | >50                                           |

|                        |                         |             |
|------------------------|-------------------------|-------------|
| GNAS-036 p14           | RACYERSNEYQLID          | >50         |
| <b>GNAS-036 p15</b>    | <b>SNEYQLIDCAQYFLD</b>  | <b>38.6</b> |
| <b>IAPP-002 p1</b>     | <b>SVALNHLKATPIERQ</b>  | <b>25.4</b> |
| IAPP-002 p2            | IPVLSRNILLELRGA         | >50         |
| IAPP-002 p3            | KSKVIRWKSGNATLP         | >50         |
| PTPRN-021 p1           | AAGVKLLEILAEHVVH        | >50         |
| <b>PTPRN-021 p2</b>    | <b>KLLEILAEHVHMSSGS</b> | <b>0.02</b> |
| PTPRN2-005 p1          | LPPRVLPAAAPSSVPR        | >50         |
| PTPRN2-005 p2          | GCLLEEGLCGASE           | >50         |
| REXO2-020 p1           | ALWIVKYYSRNSVHE         | >50         |
| REXO2-020 p2           | VKYYSRNSVHEDKKF         | >50         |
| SCG5-009 p1            | YEKMKGGERRRK            | >50         |
| SCG5-009 p2            | TRAWLDCCGDAWSFLS        | >50         |
| SCG5-009 p3            | GDAWSFLSGAVNRLK         | >50         |
| SCG5-009 p4            | WSFLSGAVNRLKPSL         | >50         |
| SCG5-009 p5            | AVNRLKPSLVGKSQN         | >50         |
| SLC30A8-002 p1         | MEFLERTYLVNDKAA         | >50         |
| <b>SLC30A8-002 p2</b>  | <b>RTYLVNDKAAKMYAF</b>  | <b>0.08</b> |
| <b>SLC30A8-002 p3</b>  | <b>AKMYAFTLESVELQQK</b> | <b>0.03</b> |
| <b>SLC30A8-002 p4</b>  | <b>GGMYHCHSGSKPTEK</b>  | <b>6.0</b>  |
| <b>IAPP trans-S p1</b> | <b>QVFLIVLSVALKLQVF</b> | <b>19.9</b> |
| <b>SCG5 p1</b>         | <b>MVSRMVSTMLSGL</b>    | <b>2.4</b>  |
| SCG5 p2                | SRMVSTMLSGLLFWL         | >50         |
| SCG5 p3                | SGLLFWLASGWTPAF         | >50         |
| SCG5 p4                | LLFWLASGWTPAFAY         | >50         |
| SCG5 p5                | EADIQRLLHGVMEQL         | >50         |
| <b>SCG5 p6</b>         | <b>QRLLHGVMEQLGIAR</b>  | <b>16.9</b> |
| SCG5 p7                | RVEYPAHQAMNLVGP         | >50         |
| SCG5 p8                | HEGLQHLGPFGNIPN         | >50         |
| SCG5 p9                | LQHLGPFGNIPNIVA         | >50         |
| SCG5 p10               | LGPFGNIPNIVAEIT         | >50         |
| SCG5 p11               | IPNIVAEITGDNIPK         | >50         |
| SCG5 p12               | PKDFSEDQGYDPDPN         | >50         |
| <b>SCG5 p13</b>        | <b>TAEFSREFQLHQHLF</b>  | <b>0.05</b> |
| SCG5 p14               | SREFQLHQHLFDPEH         | >50         |
| SCG5 p15               | QHLFDPEHDYPGLGK         | >50         |
| SCG5 p16               | KLLYEKMKGGERRRK         | >50         |
| SCG5 p17               | NVVAKKSVPHFSDDED        | >50         |
| <b>UCN3 P1</b>         | <b>PVHFLLLLLLLLLGG</b>  | <b>16.8</b> |
| <b>UCN3 P2</b>         | <b>PHKFYKAKPIFSCLN</b>  | <b>33.4</b> |
| <b>UCN3 P3</b>         | <b>KPIFSCLNTALSEAE</b>  | <b>0.34</b> |
| UCN3 P4                | KRSFHYLRSRDAS           | >50         |
| <b>UCN3 P5</b>         | <b>SFHYLRSRDASSGEE</b>  | <b>0.94</b> |
| UCN3 P6                | KKTFPISGARGGARG         | >50         |

|                  |                        |             |
|------------------|------------------------|-------------|
| <b>UCN3 P7</b>   | <b>RTKFTLSLDVPTNIM</b> | <b>7.3</b>  |
| UCN3 P8          | SLDVPTNIMNLLFNI        | >50         |
| UCN3 P9          | PTNIMNLLFNIAKAK        | >50         |
| <b>UCN3 P10</b>  | <b>LFNIAKAKNLRAQAA</b> | <b>0.05</b> |
| UCN3 P11         | AKNLRAQAAANAHLM        | >50         |
| PCSK2 p1         | GGCVSQWKAAAGFLF        | >50         |
| PCSK2 p2         | AAGFLFCVMVFASAE        | >50         |
| PCSK2 p3         | GFLFCVMVFASAERP        | >50         |
| PCSK2 p4         | RPVFTNHFLVELHKG        | >50         |
| <b>PCSK2 p5</b>  | <b>HFLVELHKGGEDKAR</b> | <b>0.32</b> |
| PCSK2 p6         | GFGVRKLPFAEGLYH        | >50         |
| PCSK2 p7         | LYHFYHNGLAKAKRR        | >50         |
| PCSK2 p8         | RVKMALQQEGFDRKK        | >50         |
| PCSK2 p9         | KRGYRDINEIDINMN        | >50         |
| PCSK2 p10        | RDINEIDINMNDPL         | >50         |
| PCSK2 p11        | EIDINMNDPLFTKQW        | >50         |
| PCSK2 p12        | DPLFTKQWYLINTGQ        | >50         |
| <b>PCSK2 p13</b> | <b>TKQWYLINTGQADGT</b> | <b>0.13</b> |
| PCSK2 p14        | AEAWELGYTGKGVTI        | >50         |
| PCSK2 p15        | GVTIGIMDDGIDYLH        | >50         |
| PCSK2 p16        | HPDLASNYNAEASYD        | >50         |
| PCSK2 p17        | ASNYNAEASYDFSSN        | >50         |
| PCSK2 p18        | SYDFSSNDPYPYPRY        | >50         |
| PCSK2 p19        | YPRYTDDWFNSHGTR        | >50         |
| PCSK2 p20        | DDWFNSHGTRCAGEV        | >50         |
| PCSK2 p21        | AGEVSAAANNNICGV        | >50         |
| PCSK2 p22        | NNNICGVGVAYNSKV        | >50         |
| <b>PCSK2 p23</b> | <b>QPFMTDIEASSISH</b>  | <b>0.07</b> |
| PCSK2 p24        | MTDIEASSISHMPQ         | >50         |
| PCSK2 p25        | ISHMPQLIDIYSASW        | >50         |
| PCSK2 p26        | LIDIYSASWGPTDNG        | >50         |
| PCSK2 p27        | SASWGPTDNGKTVDG        | >50         |
| PCSK2 p28        | ELTLQAMADGVNKGR        | >50         |
| PCSK2 p29        | SIYVWASGDGGSYDD        | >50         |
| PCSK2 p30        | DGYASSMWTISINS         | >50         |
| PCSK2 p31        | ASSMWTISINSAIND        | >50         |
| PCSK2 p32        | MWTISINSAINDGRT        | >50         |
| <b>PCSK2 p33</b> | <b>TALYDESCSSTLAST</b> | <b>0.04</b> |
| PCSK2 p34        | TTDLYGNCTLRHSGT        | >50         |
| <b>PCSK2 p35</b> | <b>NCTLRHSGTSAAAPE</b> | <b>0.83</b> |
| <b>PCSK2 p36</b> | <b>AGVFALALEANLGLT</b> | <b>7.2</b>  |
| PCSK2 p37        | GLTWRDMQHLLTVLTS       | >50         |
| PCSK2 p38        | RDMQHLLTVLTSKRN        | >50         |
| PCSK2 p39        | VHQWRRNGVGLEFNH        | >50         |



|                  |                        |             |
|------------------|------------------------|-------------|
| PCSK2 p40        | GLEFNHLFGYGVLDA        | >50         |
| PCSK2 p41        | NHLFGYGVLDAGAM         | >50         |
| PCSK2 p42        | GYGVLDAGAMVKM          | >50         |
| PCSK2 p43        | AKDWKTVPERFHCVG        | >50         |
| PCSK2 p44        | PERFHCVGGSVQDPE        | >50         |
| <b>PCSK2 p45</b> | <b>TGKLVLTLTTDACEG</b> | <b>2.9</b>  |
| PCSK2 p46        | KENFVRYLEHVQAVI        | >50         |
| PCSK2 p47        | VRYLEHVQAVITVN         | >50         |
| PCSK2 p48        | EHVQAVITVNATTR         | >50         |
| <b>PCSK2 p49</b> | <b>QAVITVNATTRGDLN</b> | <b>8.1</b>  |
| <b>PCSK2 p50</b> | <b>RGDLNINMTSPMGTK</b> | <b>20.1</b> |
| PCSK2 p51        | KVGFDKWPFMTTHTW        | >50         |
| PCSK2 p52        | DKWPFMTTHTWGED         | >50         |
| PCSK2 p53        | PFMTTHTWGEDAR          | >50         |
| <b>PCSK2 p54</b> | <b>RGTWTLELGFGVSAP</b> | <b>2.8</b>  |
| PCSK2 p55        | ELGFGVSAPQKGVLK        | >50         |
| PCSK2 p56        | KGVLKEWTLMLHGTQ        | >50         |
| PCSK2 p57        | KEWTLMLHGTQSAPY        | >50         |

<sup>a</sup>IC<sub>50</sub> represents the peptide concentration that displaces half of the reference peptide.

<sup>b</sup>Peptides selected for in vitro studies (based on IC<sub>50</sub> values) are shown in boldface.
